# Supplementary material for: Disseminated histoplasmosis diagnosed by mNGS in a middle-aged immunocompetent patient: a case report and literature review
Source: Research Square preprint supplement (doi:10.21203/rs.3.rs-8193535/v1), 2025-12-02
Supplement: Supplementary file 1 [file dc795144e71584d81fb7a572.xlsx]

## Sheet: Table 1
Table1 Biochemical parameters during admission
Biochemical parameters	Day 1	Day 4	Day 6	Day 12	Day 16	Day 24	Day 28
Haemoglobin (g/L)	120	116	113	112	114	108	106
Red blood cell count(x1012/L)	4	3.78	4.01	3.77	3.83	3.63	3.59
White blood cell count (x109/L)	7.51	6.64	6.04	5.48	6.11	5.31	4.99
Platelets (x109/L)	87	77	74	76	118	165	170
Alanine transaminase (U/L)	45	55	44	\	59	35	52
Aspartate aminotransferase(U/L)	26	30	34	\	39	32	45
Total bilirubin (μmol/L)	13	13.4	18.5	\	17.8	13.2	10.7
Serum creatinine(μmol/L)	80	76	59	\	78	80	102
Procalcitonin(ng/mL)	0.68	0.53	0.63	0.47	0.62	0.58	0.31
Normal reference range: Haemoglobin(range 130–175 g/L); Red blood cell countt(range 4.3×109–5.8 × 109/L); white blood cell count(range 3.5 × 109–9.5 × 109/L); Platelets(range 125 × 109–350 × 109/L); Alanine transaminase(range 9–50 U/L); Aspartate aminotransferase(range 15–4 U/L); Total bilirubin(range 0–26μmol/L); Serum creatinine(range 57–97μmol/L); Procalcitonin(range 0.00–0.10 ng/mL).
