# Supplementary material for: Disseminated histoplasmosis diagnosed by mNGS in a middle-aged immunocompetent patient: a case report and literature review
Source: Research Square preprint supplement (doi:10.21203/rs.3.rs-8193535/v1), 2025-12-02
Supplement: Supplementary file 2 [file ee04cf4d5f1fb112c2a6b197.xlsx]

## Sheet: Sheet1
Serial Number	Case report	Publication Year	Gender	Age	presentation/Affected organs	Diagnosis approach
1	Erythema Nodosum as the Primary Manifestation of Acute Histoplasmosis in a Pediatric Patient From an Endemic Region	2025	Male	9	Erythema nodosum	Serum serologies test
2	Hidden Histoplasmosis: Adrenal and Central Nervous System Mycosis in an Immunocompetent Patient	2025	Male	85	Adrenal glands and CNS	Serum serologies test and Histopathology
3	An outbreak of acute pulmonary histoplasmosis after exposure to guano in a hollow tree in Ecuador	2025	4 Female and 1 Male	all in their 20s	Fever and arthro-myalgias in three case;Gastrointestinal symptoms with asthenia and lymphadenopathy in the other two cases.	Serum serologies test
4	Disseminated Blastomycosis: A Case of Multisite Infection in an Immunocompetent Patient	2025	Male	54	Right foot and thigh pain, erythema, and a non-healing purulent ulcer on the right buttock	Fungal culture and Histopathology
5	Cerebral Abscess Caused by Histoplasma capsulatum in an Immunocompetent Patient: A Case Report	2025	Male	44	Seizures and progressive headache	Histopathology
6	Progressive Disseminated Histoplasmosis with Primary Adrenal Insufficiency in Immunocompetent Person: A Case Report	2025	Male	51	Adrenal insufficiency	Histopathology
7	Disseminated liver histoplasmosis in an immunocompetent individual cured by liver transplantation and voriconazole from China: A case report	2025	Male	43	Liver	Histopathology and next-generation sequencing analysis
8	Histoplasmosis: No Longer Just a Disease of the Immunocompromised	2025	Male	56	Lungs, bone marrow, and spleen	Histopathology
9	Histoplasma capsulatum var. duboisii: A Case of Histoplasmosis 50 Years After the Exposure	2025	Male	73	Gingival lesion and a lesion on the left wrist join	Histopathology and Fungal culture and Sequencing
10	Disseminated African Histoplasmosis in an Immunocompetent Patient in Morocco: A Case Report	2025		22	Diffuse rash, coxalgia, and hepatosplenomegaly	Histopathology
11	Disseminated histoplasmosis in a 4-month-old infant presenting with prolonged fever and pancytopenia: A case report	2025	Female	4m	Fever and hepatosplenomegaly	Metagenomic sequencing
12	Disseminated Histoplasmosis With Lung and Liver Involvement in an Immunocompetent Patient	2024	Male	50+	Lung and Liver	Urine Histoplasma antigen
13	CNS histoplasmosis coexisting with pulmonary tuberculosis in a HIV negative patient: case report	2024	Male	68	CNS	Urine Histoplasma antigen;Histopathology
14	Central Nervous System Histoplasmosis After Acute COVID-19 in An Adolescent	2024	Male	13	CNS, pulmonic, and splenic	Serum serologies test
15	Intestinal histoplasmosis in an immunocompetent patient: A case report	2024	Male	35	Intestinal	Histopathology
16	Case Report: Primary Cutaneous Histoplasmosis in an Immunocompetent Patient After Cosmetic Injection of Platelet-Rich Plasma Treated with Trimethoprim-Sulfamethoxazole	2024	Female	35	Face, neck, buttocks	Histopathology
17	A case of disseminated histoplasmosis diagnosed by bone marrow aspiration in immunocompetent patient from nonendemic area, Rajkot, Gujarat	2024	Male	50	Fever and ileo-cecal thickening	Histopathology
18	Histoplasmosis peritonitis in an immunocompetent patient: case report	2024	Male	36	Peritonitis	Histopathology and PCR analysis
19	Disseminated Histoplasmosis Causing Temporally and Spatially Discrete Gastrointestinal Perforations in an HIV-Negative Patient	2024	Male	25	Gastrointestinal tract	Histopathology
20	Adrenal histoplasmosis in an immunocompetent host	2023	Male	54	Adrenal	Histopathology
21	Gastrointestinal histoplasmosis presenting as a small bowel obstruction in an immunocompetent patient	2023	Male	80	Ileal	Histopathology
22	Painful Granulomatous Hashimoto Thyroiditis Uncovered Systemic Histoplasmosis	2024	Male	32	Thyroid	Histopathology and Serum serologies test
23	Histoplasma tympanomastoiditis: Case report and literature review	2023	Male	52	Purulent otorrhea, vertigo, and facial nerve palsy	Histopathology and Fungal culture
24	Vertebromedular histoplasmosis: About a case of transverse myelitis in a young and immunocompetent adult	2023	Male	48	Vertebra-medullar	Histomorphology
25	Disseminated histoplasmosis in an immunocompetent pediatric patient	2023	Female	3	Febrile syndrome and hepatosplenomegaly	Fungal culture and Histopathology
26	Hemophagocytic Lymphohistiocytosis Secondary to Disseminated Histoplasmosis in HIV Seronegative Patients: A Case Report and Review of the Literature	2022	Male	46	Fever and lymphadenopathy	Fungal culture
27	Histoplasmosis masquerading as tuberculosis: A report of three cases in immunocompetent children	2022	Male	8	Generalized lymphadenopathy fever and abdominal pain	Histopathology
			Male	6	Fever, enlarged cervical lymph node	Histopathology
			Female	5	hepatosplenomegaly	Histopathology
28	Disseminated histoplasmosis in an AIDS patient with immunologic non-response to HAART: A case report	2022	Male	46	Cough, enlarged lymph nodes in the head and neck region	Urinary Histoplasma antigen and Histopathology
29	Oral Histoplasmosis Presenting as a Solitary Ulcer on Tongue in an Immunocompetent Adult	2022	Male	71	Ulcerative lesion on the tongue	Histopathology
30	Histoplasma capsulatum culture-negative prosthetic valve endocarditis presenting as a cystic mass	2022	Male	58	Endocarditis	Serum serologies test and Urine Histoplasma antigen
31	Disseminated histoplasmosis in an immunocompetent patient with COVID-19 pneumonia	2022	Male	61	Pneumonia	Serum serologies test and Urine Histoplasma antigen
32	Progressive Disseminated Histoplasmosis in an Immunocompetent Host: A Rare Presentation of an Uncommon Disease	2021	Male	42	Hepatosplenomegaly and mesenteric lymphadenopathy	Histopathology
33	Isolated gastrointestinal histoplasmosis: A rare diagnosis of pediatric chronic abdominal pain	2021	Male	8	Gastrointestinal	Histopathology
34	Bilateral Adrenal Histoplasmosis in an Immunocompetent Host	2021	Male	71	Bilateral Adrenal	Fungal culture and Serum serologies test
35	Upper extremity Histoplasma capsulatum treatment with isavuconazole	2021	Male	68	Left wrist	Fungal culture and MALDI-TOF MS
36	Pulmonary histoplasmosis diagnosed in a Japanese woman after traveling to central and South America: A case report	2021	Female	33	Pulmonary	Histopathology and PCR analysis
37	Primary cutaneous histoplasmosis difficult to treat in immunocompetent patient: case report and literature review	2021	/	26	Erythematous papular lesion	Histopathology
38	Autochthonous Case of Pulmonary Histoplasmosis, Switzerland	2021	Male	46	Pulmonary	Histopathology
39	Hemophagocytic lymphohistiocytosis secondary to disseminated histoplasmosis in an immunocompetent patient	2021	Male	16	Hemophagocytic lymphohistiocytosis	Fungal culture and MALDI-TOF MS
